# Supplementary material for: Loss of flavin adenine dinucleotide (FAD) impairs sperm function and male reproductive advantage in C. elegans
Source: eLife. 2020 Feb 5;9:e52899. doi: 10.7554/eLife.52899 (PMC7032928; doi:10.7554/eLife.52899)
Supplement: Supplementary file 1. [file elife-52899-supp1.xlsx]

## Sheet: Sheet2
Supplemental File 1. Sample size and replicate number for all experiments.
Fig 1B	WT	alh-6
number of worms	17	18
Fig 1C	WT	alh-6
number of worms	9	9
Fig 1D	gst-4p::gfp	alh-6;gst-4p::gfp
number of worms	19	20
Fig 1F	WT x WT males	alh-6 x WT males
number of worms	12	12
Fig 1G	WT x gst-4p::gfp males	WT x alh-6;gst-4p::gfp males
number of worms	11	14
Fig 2A	WT	alh-6
number of worms	5	5
Fig 2B	WT	alh-6
total n from 3 reps	287	297
Fig 2C	WT	alh-6
total n from 3 reps	546	555
Fig 2D	WT	alh-6
number of worms	8	7
Fig 2E	WT	alh-6
total n from 3 reps	200	195
Fig 2F	WT	alh-6
total n from 3 reps	479	407
Fig 3	WT - L4	alh-6 - L4	WT - Day 3	alh-6 - Day 3
4000 worms each	3	3	3	3
Fig 4B	WT - L4	alh-6 - L4
3000-5000 worms each	8	9
Fig 4C	WT - L4	alh-6 - L4
3000-5000 worms each	4	4
Fig 4E	WT - L4	alh-6 - L4	alh-6 + riboflavin - L4
3000-5000 worms each	8	9	6
Fig 4F	WT	alh-6	alh-6 + riboflavin
total n from 3 reps	269	305	323
Fig 4G	WT	alh-6	alh-6 + riboflavin
total n from 3 reps	546	555	353
Fig 4H	WT - L4440	WT - R10H10.6 RNAi
total n from 3 reps	181	205
Fig 4I	WT - L4440	WT - flad-1 RNAi
total n from 3 reps	238	265
Fig 4J	WT - L4440	WT - R10H10.6 RNAi
total n from 3 reps	543	540
Fig 4K	WT - L4440	WT - flad-1 RNAi
total n from 3 reps	543	540
Fig 5E	WT	alh-6
number of cells	37	46
Fig 5F	WT	alh-6
number of cells	38	32
Fig 5G	WT - L4440	WT - R10H10.6 RNAi
total n from 3 reps	100	102
Fig 5H	WT - L4440	WT - flad-1 RNAi
total n from 3 reps	100	89
Fig 5I	WT	alh-6	alh-6 + riboflavin
total n from 3 reps	105	105	104
Fig 5J	WT - L4440	WT - eat-3 RNAi	WT - fzo-1 RNAI
total n from 3 reps	103	117	92
Fig 5K	alh-6 - L4440	alh-6 - eat-3 RNAi	alh-6 - fzo-1 RNAI
total n from 3 reps	119	102	102
Fig 5L	WT	alh-6	drp-1	alh-6;drp-1
total n from 3 reps	156	133	157	140
Fig 5M	WT	alh-6	drp-1	alh-6;drp-1
total n from 3 reps	419	476	439	432
Fig 5N	WT - L4440	WT - fzo-1 RNAI	alh-6 - L4440	alh-6 - fzo-1 RNAI
total n from 3 reps	419	476	439	432
Fig 5O	WT - L4440	WT - eat-3 RNAi	alh-6 - L4440	alh-6 - eat-3 RNAi
total n from 3 reps	453	477	486	487
Fig 6A	WT - L4440	WT - alh-6 RNAi
total n from 3 reps	173	221
Fig 6B	WT - L4440	WT - alh-6 RNAi
total n from 3 reps	500	516
Fig 6C	WT - L4440	WT - alh-6 RNAi
total n from 3 reps	99	100
Fig 6D	WT - L4440	WT - R10H10.6 RNAi
total n from 3 reps	173	227
Fig 6E	WT - L4440	WT - R10H10.6 RNAi
total n from 3 reps	500	502
Fig 6F	WT - L4440	WT - R10H10.6 RNAi
total n from 3 reps	99	97
Fig 6G	WT - L4440	WT - flad-1 RNAi
total n from 3 reps	173	202
Fig 6H	WT - L4440	WT - flad-1 RNAi
total n from 3 reps	500	496
Fig 6I	WT - L4440	WT - flad-1 RNAi
total n from 3 reps	98	98
Fig 6J	non-transgenic (line 1)	transgenic (line 1)	non-transgenic (line 2)	transgenic (line 2)
total n from 3 reps	193	281	303	233
Fig 6K	non-transgenic (line 1)	transgenic (line 1)	non-transgenic (line 2)	transgenic (line 2)
total n from 3 reps	460	473	440	517
Fig 6L	non-transgenic (line 1)	transgenic (line 1)	non-transgenic (line 2)	transgenic (line 2)
total n from 3 reps	90	105	100	104
Figure 1–figure supplement 2A	WT	alh-6
number of worms	10	10
Figure 1–figure supplement 2B	WT	alh-6
number of worms	9	9
Figure 1–figure supplement 3A	Day 4 WT x gst-4p::gfp males	Day 4 WT x alh-6;gst-4p::gfp males
number of worms	9	10
Figure 1–figure supplement 3B	Day 4 alh-6 x gst-4p::gfp males	Day 4 alh-6 x alh-6;gst-4p::gfp males
number of worms	10	9
Figure 2–figure supplement 1A	WT	alh-6
number of worms	14	15
Figure 2–figure supplement 1C	WT	alh-6
total n from 3 reps	399	378
Figure 2–figure supplement 1D	WT	alh-6
total n from 3 reps	320	310
Figure 2–figure supplement 1E	WT	alh-6
total n from 3 reps	299	298
Figure 3–figure supplement 1	WT - L4	alh-6 - L4	WT - Day 3	alh-6 - Day 3
4000-5000 worms each	3	3	3	3
Figure 4–figure supplement 1A	WT - Day 3	alh-6 - Day 3
3000-5000 worms each	3	3
Figure 4–figure supplement 1B	WT x gst-4p::gfp males	WT x alh-6;gst-4p::gfp males	WT x gst-4p::gfp males + riboflavin	WT x alh-6;gst-4p::gfp males + riboflavin
number of worms	11	14	8	11
Figure 4–figure supplement 1C	WT	WT + riboflavin
total n from 3 reps	269	312
Figure 4–figure supplement 1D	WT	WT + riboflavin
total n from 3 reps	546	414
Figure 4–figure supplement 1E	WT - L4440	WT - R10H10.6 RNAi
3000-5000 worms each	3	3
Figure 4–figure supplement 1F	WT - L4440	WT - flad-1 RNAi
3000-5000 worms each	3	3
Figure 4–figure supplement 1G	WT - L4	alh-6 - L4	WT - Day 3	alh-6 - Day 3
3000-5000 worms each	3	3	3	3
Figure 4–figure supplement 1H	WT - L4	alh-6 - L4	WT - Day 3	alh-6 - Day 3
3000-5000 worms each	3	3	3	3
Figure 4–figure supplement 1I	WT - L4	alh-6 - L4	WT - Day 3	alh-6 - Day 3
3000-5000 worms each	3	3	3	3
Figure 5–figure supplement 1C	WT	alh-6
total n from 3 reps	83	87
Figure 5–figure supplement 1D	WT	WT + riboflavin
total n from 3 reps	105	105
Figure 5–figure supplement 1E	all conditions
3000-5000 worms each	3
Figure 5–figure supplement 1F	WT - L4440	alh-6 L4440
3000-5000 worms each	3	3
Figure 6–figure supplement 1A	WT - L4440	WT - alh-6 RNAi
total n from 3 reps	267	299
Figure 6–figure supplement 1B	WT - L4440	WT - alh-6 RNAi
total n from 3 reps	458	465
Figure 6–figure supplement 1C	WT - L4440	WT - alh-6 RNAi
total n from 3 reps	238	258
Figure 6–figure supplement 1D	WT - L4440	WT - alh-6 RNAi
total n from 3 reps	543	547
Figure 6–figure supplement 1E	WT - L4440	WT - alh-6 RNAi
total n from 3 reps	100	100
Figure 6–figure supplement 1F	WT - L4440	WT - alh-6 RNAi
3000-5000 worms each	3	3
	s
